# Supplementary material
Source: publisher figshare collection journal article supplement (https://frontiersin.figshare.com/ndownloader/files/31653515)
Supplement: Supplementary file 1 [file 31653515]

**Supplementary table 2: List of biotic variables recorded or measured during the survey of the 130 visited fields**

|  | **Types** | |  |
| --- | --- | --- | --- |
| **Variables** | **Qualitative** | **Quantitative** | **Number of observations per district** |
| **Field diagnostic variables** |  |  |  |
| Age of cassava plants in months* |  | x | 300 plants |
| Presence of CBSD symptoms | x |  | 300 plants |
| Observed CBSD symptoms | x |  | 300 plants |
| Presence of whitefly | x |  | 300 plants |
| CBSD field incidence (%) |  | x | 300 plants |
| **Cassava infection (PCR detection)** |  |  |  |
| PCR detection of CBSV in cassava (Yes/ No) | x |  | 10 fields (10 plants per field pooled as 1 sample) |
| PCR detection of UCBSV in cassava (Yes/ No) | x |  | 10 fields (10 plants per field pooled as 1 sample) |
| PCR detection of both CBSV and UCBSV (Yes / No) | x |  | 10 fields (10 plants per field pooled as 1 sample) |
| Variables marked with * were grouped into categories prior to the analysis | | | |
